# Supplementary material
Source: Springer Nature journal article supplement (https://www.springermedizin.de/resource/supplementary/12985_2007_297_MOESM2_ESM.pdf/9607734)
Supplement: MOESM2 [file 9607734]

Inner sense primer TGV

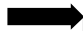

Consensus LCV **G T V G C M M A Y G G Y Y T S**  
CgueLCV1 **G T G G C C A A C G G C C T C**  
MfasLCV1 **G T G G C C A A C G G C C T C**  
MfasLCV1 LNA **G T G G C C A A C G G C C T C**

1

EBV

EBV LNA

PtroLCV1

PtroLCV1 LNA

GgorLCV1

GgorLCV1 LNA

PhamLCV2

PhamLCV2 LNA

CalHV3

CalHV3 LNA

Consensus LCV

|                      |   |                    |   |                          |                    |                          |
|----------------------|---|--------------------|---|--------------------------|--------------------|--------------------------|
| <b>C C G A G G G</b> | C | <b>C A G C T</b>   | T | <b>C G A</b>             | <b>G T C</b>       | <b>A T C</b>             |
|                      |   | <b>A G G G</b>     | C | <b>C A G C T</b>         | T                  | <b>C G A G T C A T C</b> |
| <b>C C G A G G G</b> | C | <b>C G G C T A</b> | C | <b>G C</b>               | <b>G T C</b>       | <b>A T C</b>             |
|                      |   | <b>C G G C T A</b> | C | <b>G C</b>               | <b>G T C</b>       | <b>A T C</b>             |
| <b>C C G A G G G</b> | T | <b>C G G C T A</b> | C | <b>G C</b>               | <b>G T T A T C</b> |                          |
|                      |   | <b>G G G</b>       | T | <b>C G G C T A</b>       | C                  | <b>G T T A T C</b>       |
| <b>C C G C G G G</b> | C | <b>C G G T T G</b> | C | <b>G T G T C A T C</b>   |                    |                          |
|                      |   | <b>C G G T T G</b> | C | <b>G T G T C A T C</b>   |                    |                          |
| <b>C G G A T G G</b> | T | <b>A T A C T G</b> | C | <b>G A G T C A T T</b>   |                    |                          |
| <b>C G G A T G G</b> | T | <b>A T A C T G</b> | C | <b>G A G T C A T T</b>   |                    |                          |
| V V <b>G V N G G</b> | B | N N N V <b>T</b>   | D | M <b>G N G T H A T Y</b> |                    |                          |

Inner anti-sense primer IYG

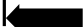

175
